# Supplementary material for: Structural adaptations in the bovine serum albumin protein in archetypal deep eutectic solvent reline and its aqueous mixtures
Source: Royal Society of Chemistry journal article supplement (doi:10.1039/d1cp05829k), 2022-01-01
Supplement: d1cp05829k1.pdf [file d1cp05829k1.pdf]

**Electronic Supplementary Information for  
Structural Adaptations in Bovine Serum Albumin  
Protein in Archetypal Deep Eutectic Solvent  
Reline and Its Aqueous Mixtures**

Monika Kumari, Pratibha Kumari, and Hemant K. Kashyap\*

*Department of Chemistry, Indian Institute of Technology Delhi, Hauz Khas, New Delhi  
110016, India*

E-mail: [hkashyap@chemistry.iitd.ac.in](mailto:hkashyap@chemistry.iitd.ac.in)

Phone: +91-(0)11-26591518. Fax: +91-(0)11-26581102

# S1 Force-Field Validation

**Methodology:** Table S1 summarizes the compositions of reline-water mixtures studied. PACKMOL<sup>1</sup> was used to randomly pack the molecules in cubic simulation boxes. The parameters for reline components ([Ch]<sup>+</sup>, Cl<sup>-</sup>, and urea) were taken from CHARMM general force-field<sup>2</sup> as used in our previous studies<sup>3,4</sup> while water molecules were considered as TIP3P model.<sup>5</sup> All the simulation have been carried out for  $\sim 60$  ns in NPT ensemble using GROMACS 5.1.1.<sup>6</sup> The temperature was maintained to 303 K using Nosé-Hoover thermostat<sup>7-9</sup> and the pressure was kept constant at 1 bar using Parrinello-Rahman barostat.<sup>10</sup> The equations of motion were integrated at a timestep of 1 fs. Periodic boundary conditions were applied in all the directions. A cutoff distance of 1.2 nm was considered for short-range interactions. The long-range electrostatics were evaluated using PME.<sup>11,12</sup> The last 10 ns trajectory with frame saved at every 100 fs has been utilized to calculate density and X-ray scattering structure function  $S(q)$ . The X-ray structure functions have been calculated as per the previous literature.<sup>4,13,14</sup>

**Table S1: Summary of the system compositions studied.**

| System  | Reline (wt%) | Water (wt%) | [Ch] <sup>+</sup> /Cl <sup>-</sup> ion pairs | urea | water |
|---------|--------------|-------------|----------------------------------------------|------|-------|
| rel-1w  | 93.5         | 6.5         | 1000                                         | 2000 | 1000  |
| rel-2w  | 87.8         | 12.2        | 1000                                         | 2000 | 2000  |
| rel-4w  | 78.3         | 21.7        | 1000                                         | 2000 | 4000  |
| rel-10w | 59.0         | 41.0        | 1000                                         | 2000 | 10000 |
| rel-20w | 41.9         | 58.1        | 1000                                         | 2000 | 20000 |
| water   | 0.0          | 100         | -                                            | -    | 1000  |

**Results and Discussion:** Figure S1 illustrates the comparison of bulk densities of reline-water mixtures at varying compositions in presence of TIP3P water with the previously reported SPC/E model.<sup>4</sup> A very good agreement is observed at all the studied concentrations. Figure S2 displays the comparative plots of  $S(q)$ s of reline-water mixtures at varying

concentrations. A good overlap can be noticed from the plots in presence of both the water models. However, a slight difference in the  $S(q)$ s of pure SPC/E and TIP3P water can be noted with respect to splitting of the principal peak, which is a known fact for TIP3P water model.<sup>5</sup> Apart from this, Figure S2 also conveys that in corroboration with the SPC/E water model, TIP3P water also shows the DES structural transition at and above 41 wt% of water (rel-10w). The molecular arrangement of reline is changed from “water-in-reline” to an aqueous solution of reline components i.e. below 41 wt%, all the  $S(q)$ s are similar to that of pure reline but at and above 41 wt% of water the  $S(q)$ s resemble pure water structure function. Recently, this structural transition at 41 wt% has also been observed experimentally through 2D IR spectroscopy,<sup>15</sup> which further validates the computational findings.

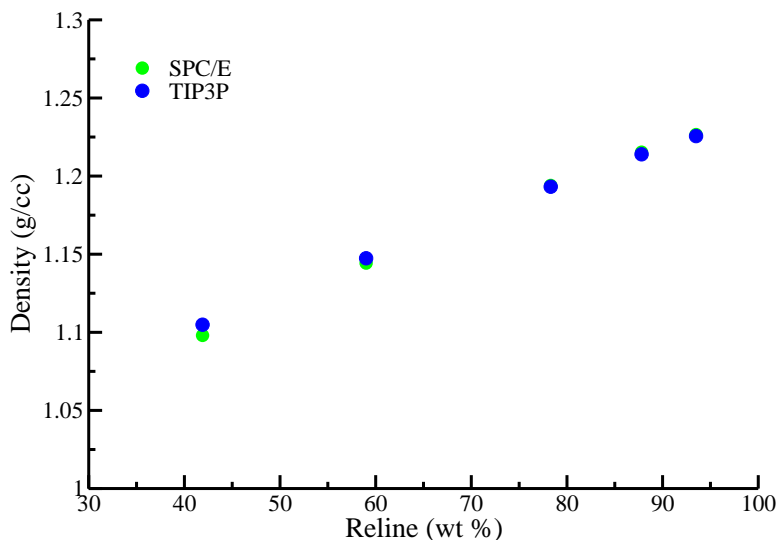

Figure S1: Comparison plots for densities of reline-water mixtures in presence of SPC/E<sup>4</sup> and TIP3P water models. Density data for SPC/E water model has been reprinted with permission from ref.<sup>4</sup> Copyright 2018 American Chemical Society.

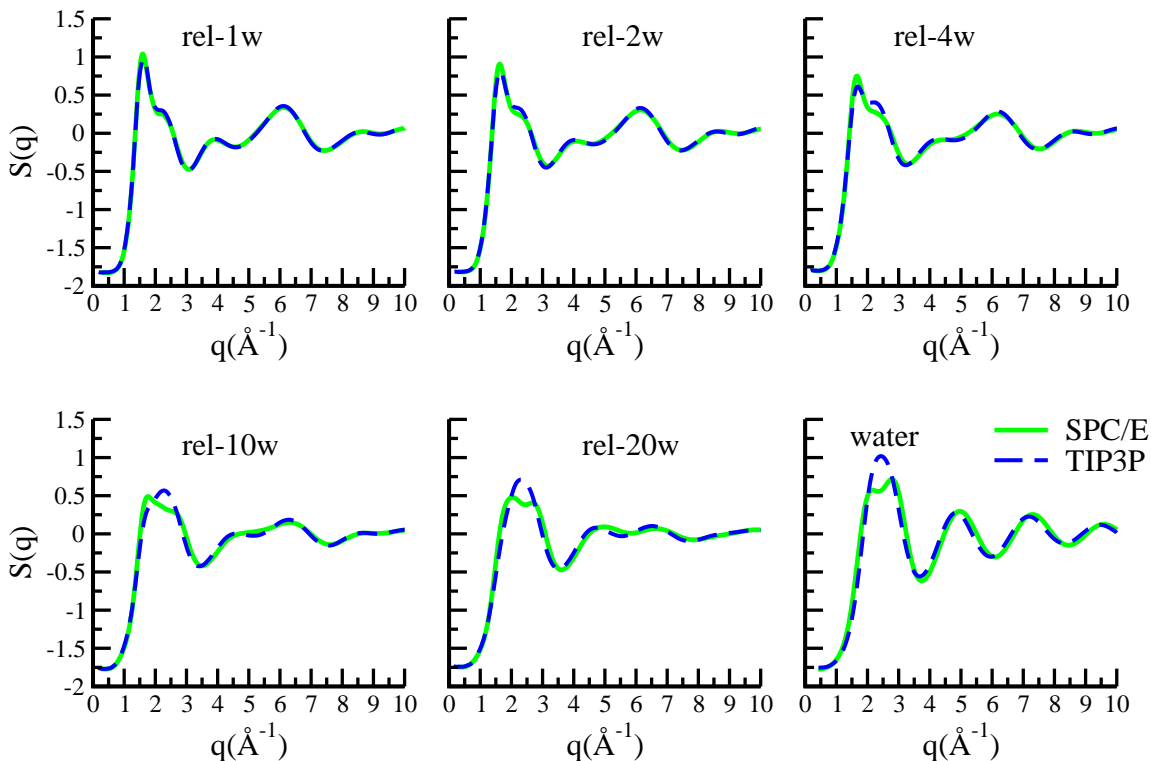

Figure S2: Comparison of simulated X-ray structure functions for reline-water mixtures using SPC/E<sup>4</sup> and TIP3P water model. X-ray scattering data for SPC/E water model has been reprinted with permission from ref.<sup>4</sup> Copyright 2018 American Chemical Society.

**Table S2: Summary of all the systems investigated for reversibility of structural modulations.\***

| System | Denatured BSA conformation taken from | water |
|--------|---------------------------------------|-------|
| R50    | 50/50 reline/water                    | 50706 |
| R75    | 75/25 reline/water                    | 60072 |
| R100   | pure reline                           | 36576 |

\*Each system was neutralized using 17 K<sup>+</sup> ions.

**Table S3: Average percentage of BSA secondary structures for 350 ns reversibility runs calculated using DSSP algorithm. Last 100 ns trajectories were used for the computation of average values.**

| System | $\alpha$ -helix | $3_{10}$ -helix | coil | turn | bend |
|--------|-----------------|-----------------|------|------|------|
| R50    | 60.1            | 3.0             | 18.3 | 8.2  | 10.3 |
| R75    | 46.3            | 3.2             | 23.5 | 14.1 | 12.4 |
| R100   | 52.8            | 8.3             | 18.9 | 14.0 | 10.8 |

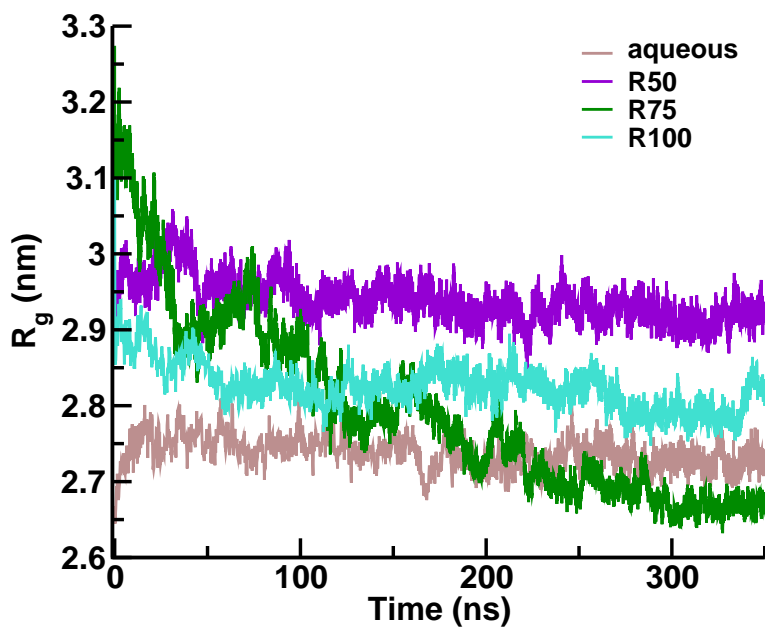

Figure S3: Time-dependent variations in radius of gyration ( $R_g$ ) on aqueous re-equilibration of denatured protein conformations. Aqueous system data are also plotted for the comparison.

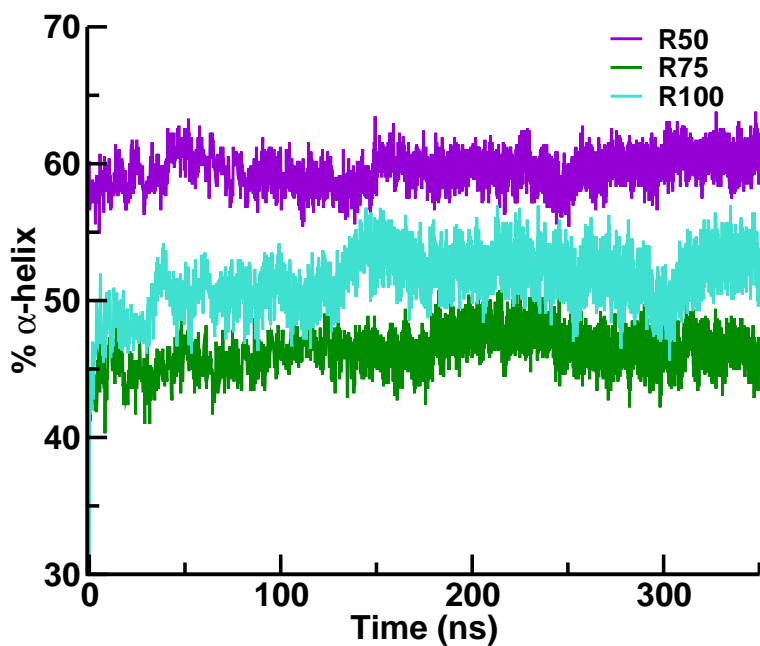

Figure S4: Time evolution of percentage  $\alpha$ -helical content for re-equilibration runs of denatured protein systems.

## References

- (1) Martínez, L.; Andrade, R.; Birgin, E. G.; Martínez, J. M. Packmol: A Package for Building Initial Configurations for Molecular Dynamics Simulations. *J. Comput. Chem.* **2009**, *30*, 2157–2164.
- (2) Vanommeslaeghe, K.; Hatcher, E.; Acharya, C.; Kundu, S.; Zhong, S.; Shim, J.; Darian, E.; Guvench, O.; Lopes, P.; Vorobyov, I. et al. CHARMM general force field: A force field for drug-like molecules compatible with the CHARMM all-atom additive biological force fields. *J. Comput. Chem.* **2010**, *31*, 671–690.
- (3) Kaur, S.; Sharma, S.; Kashyap, H. K. Bulk and Interfacial Structures of Reline Deep Eutectic Solvent: A Molecular Dynamics Study. *J. Chem. Phys.* **2017**, *147*, 194507.
- (4) Kumari, P.; Shobhna,; Kaur, S.; Kashyap, H. K. Influence of Hydration on the Structure of Reline Deep Eutectic Solvent: A Molecular Dynamics Study. *ACS Omega* **2018**, *3*, 15246–15255.
- (5) Jorgensen, W. L.; Chandrasekhar, J.; Madura, J. D.; Impey, R. W.; Klein, M. L. Comparison of Simple Potential Functions for Simulating Liquid Water. *J. Chem. Phys.* **1983**, *79*, 926–935.
- (6) van der Spoel, D.; Lindahl, E.; Hess, B.; Groenhof, G.; Mark, A. E.; Berendsen, H. J. C. GROMACS: Fast, Flexible, and Free. *J. Comput. Chem.* **2005**, *26*, 1701–1718.
- (7) Nose, S. A Unified Formulation of the Constant Temperature Molecular Dynamics Methods. *J. Chem. Phys.* **1984**, *81*, 511–519.
- (8) Nose, S. A Molecular Dynamics Method for Simulations in the Canonical Ensemble. *Mol. Phys.* **1984**, *52*, 255 – 268.
- (9) Hoover, W. G. Canonical Dynamics: Equilibrium Phase-Space Distributions. *Phys. Rev. A* **1985**, *31*, 1695.

- (10) Parrinello, M.; Rahman, A. Polymorphic Transitions in Single Crystals: A New Molecular Dynamics Method. *J. Appl. Phys.* **1981**, *52*, 7182–7190.
- (11) Essmann, U.; Perera, L.; Berkowitz, M. L.; Darden, T.; Lee, H.; Pedersen, L. G. A Smooth Particle Mesh Ewald Method. *J. Chem. Phys.* **1995**, *103*, 8577–8593.
- (12) Darden, T.; York, D.; Pedersen, L. Particle Mesh Ewald: An Nlog(n) Method for Ewald Sums in Large Systems. *J. Chem. Phys.* **1993**, *98*, 10089–10092.
- (13) Kashyap, H. K.; Hettige, J. J.; Annapureddy, H. V. R.; Margulis, C. J. SAXS Anti-Peaks Reveal the Length-Scales of Dual Positive-Negative and Polar-Apolar Ordering in Room-Temperature Ionic Liquids. *Chem. Commun.* **2012**, *48*, 5103–5105.
- (14) Kaur, S.; Kashyap, H. K. Unusual Temperature Dependence of Nanoscale Structural Organization in Deep Eutectic Solvents. *J. Phys. Chem. B* **2018**, *122*, 5242–5250.
- (15) Sakpal, S. S.; Deshmukh, S. H.; Chatterjee, S.; Ghosh, D.; Bagchi, S. Transition of a Deep Eutectic Solution to Aqueous Solution: A Dynamical Perspective of the Dissolved Solute. *J. Phys. Chem. Lett.* **2021**, *12*, 8784–8789.
